# Supplementary material for: Preparation of porous silica films in a binary template system for double-layer broadband antireflective coatings
Source: Royal Society of Chemistry journal article supplement (doi:10.1039/c4ra17141a), 2015-01-01
Supplement: c4ra17141a1.pdf [file c4ra17141a1.pdf]

## Supporting information

for

### Preparation of porous silica films in a binary template system for double-layer broadband antireflective coatings

Yuanyang Li<sup>†</sup>, Haibing Lv<sup>‡</sup>, Longqiang Ye<sup>†</sup>, Lianghong Yan<sup>‡</sup>, Yulu Zhang<sup>†</sup>, BiBo Xia<sup>†</sup>,  
Hongwei Yan<sup>\*‡</sup>, and Bo Jiang<sup>\*†</sup>.

<sup>†</sup>Key Laboratory of Green Chemistry & Technology, College of Chemistry, Sichuan University, Chengdu, 610064, China. E-mail: [jiangbo@scu.edu.cn](mailto:jiangbo@scu.edu.cn)

<sup>‡</sup>Research Center of Laser Fusion, China Academy of Engineering Physics, Mianyang 621900, China. E-mail: [hwyan@163.com](mailto:hwyan@163.com)

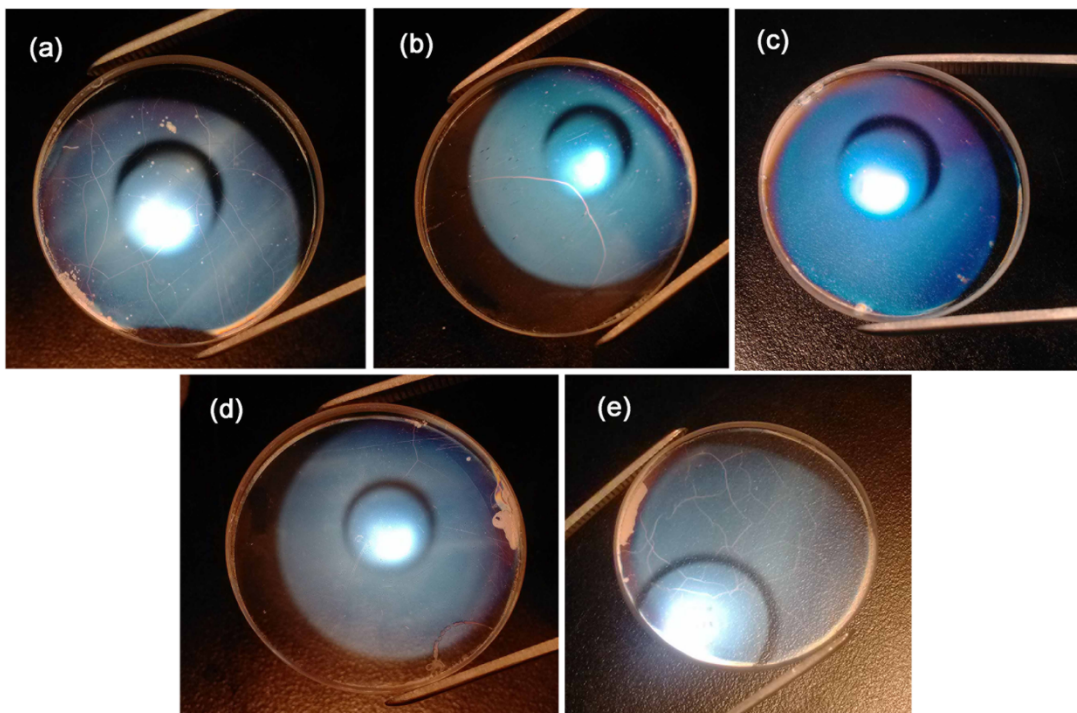

Figure S1. The digital images of the single-layer coatings made by sols with the molar ratio of two templates CTAB/PPG ranged from 0.6-1.2. (a) CTAB/PPG=0.6, (b)CTAB/PPG=0.8 (c)CTAB/PPG=1.0, (d)CTAB/PPG=1.2, (e)CTAB/PPG=1.4.

A uniform and crack-free coating was obtained when the molar ratio of CTAB/PPG is 1.0. The more the ratio deviate from 1.0, the more crack appeared on the surface.
